# Supplementary material for: Mechanistic insight into the selective hydrogenolysis of sorbitol to propylene glycol and ethylene glycol on supported Ru catalysts
Source: Royal Society of Chemistry journal article supplement (doi:10.1039/c6cy00928j), 2016-01-01
Supplement: c6cy00928j1.pdf [file c6cy00928j1.pdf]

Supplementary information for

**Mechanistic insight into selective hydrogenolysis of sorbitol to  
propylene glycol and ethylene glycol on supported Ru catalysts**

Yuqing Jia and Haichao Liu\*

Beijing National Laboratory for Molecular Sciences, State Key Laboratory for Structural  
Chemistry of Stable and Unstable Species, College of Chemistry and Molecular Engineering,  
Peking University, Beijing 100871, China

\*Corresponding author. E-mail: hcliu@pku.edu.cn; Fax: +86-10-6275-4031

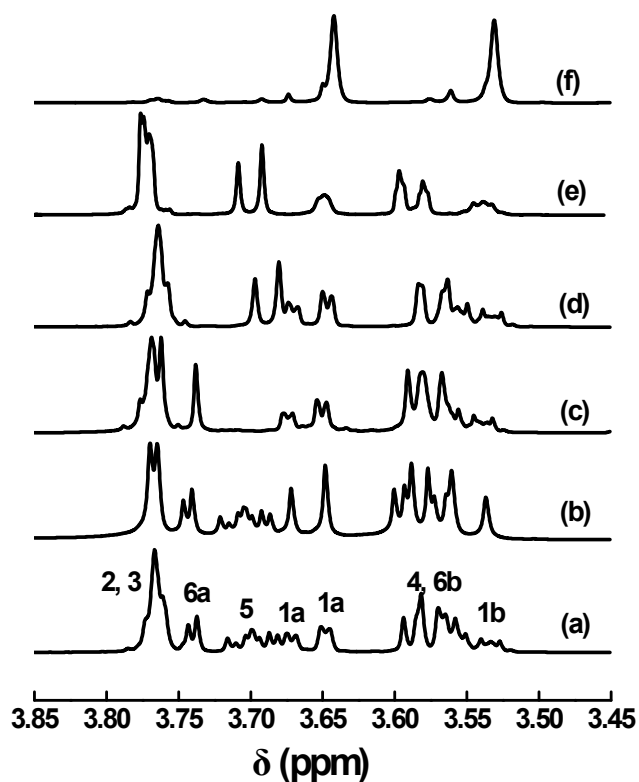

**Fig. S1** <sup>1</sup>H NMR spectra of different D-sorbitol molecules in D<sub>2</sub>O at room temperature.

(a) D-sorbitol; (b) D-sorbitol-2-d<sub>1</sub>; (c) D-sorbitol-5-d<sub>1</sub>; (d) D-sorbitol-6,6-d<sub>2</sub>; (e) D-sorbitol-1,6,6-d<sub>3</sub>; (f) D-sorbitol-1,2,3,4,5,6,6-d<sub>7</sub>. All H atoms at different C positions are labeled in the spectrum of D-sorbitol (a). For D-sorbitol-1,2,3,4,5,6,6-d<sub>7</sub>, its H atoms at C-1 position was substituted by deuterium equally at C(1)-H<sub>a</sub> and C(1)-H<sub>b</sub> positions.

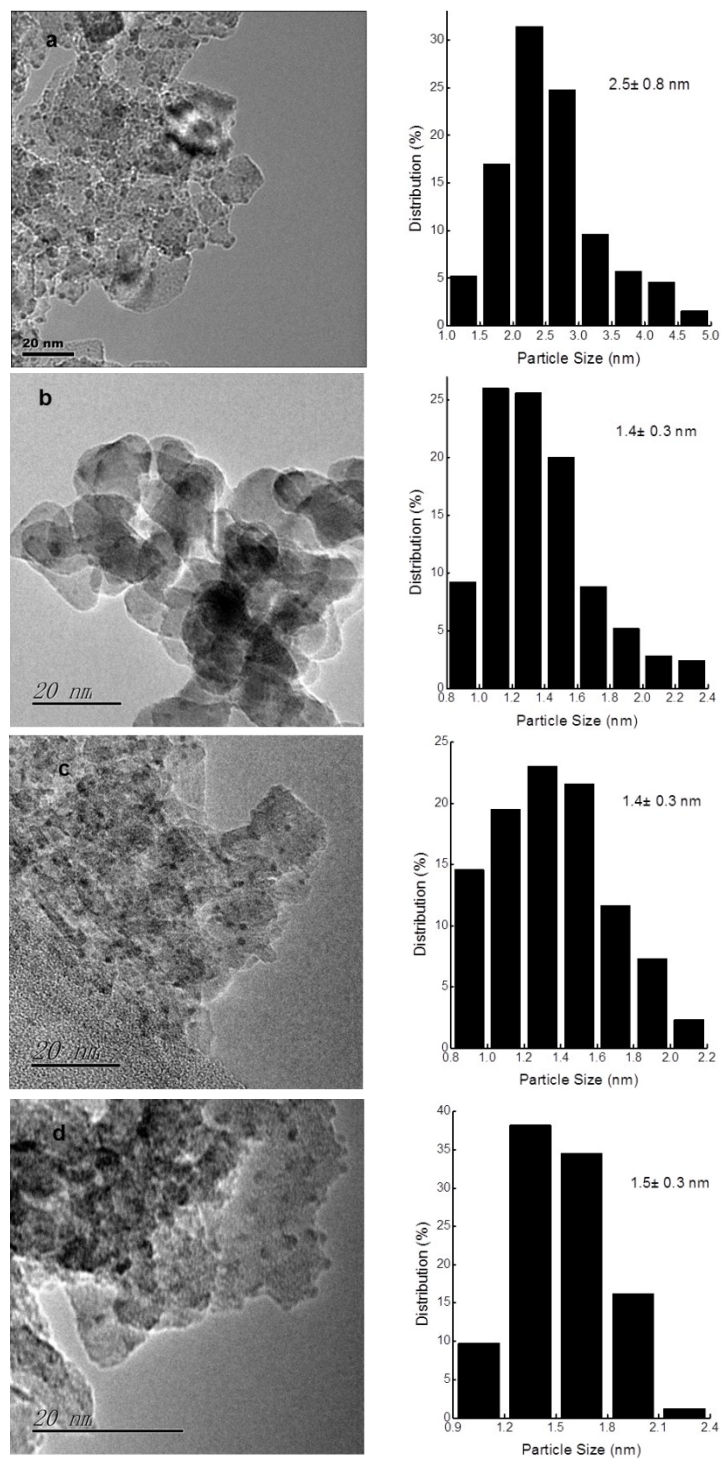

**Fig. S2** TEM micrographs and histograms of Ru particle size distribution for different Ru catalysts (scale bar=20 nm). (a) Ru/MgO,  $2.5 \pm 0.8$  nm; (b) Ru/m-ZrO<sub>2</sub>,  $1.4 \pm 0.3$  nm; (c) Ru/Al<sub>2</sub>O<sub>3</sub>,  $1.4 \pm 0.3$  nm; (d) Ru/TiO<sub>2</sub>,  $1.5 \pm 0.3$  nm.

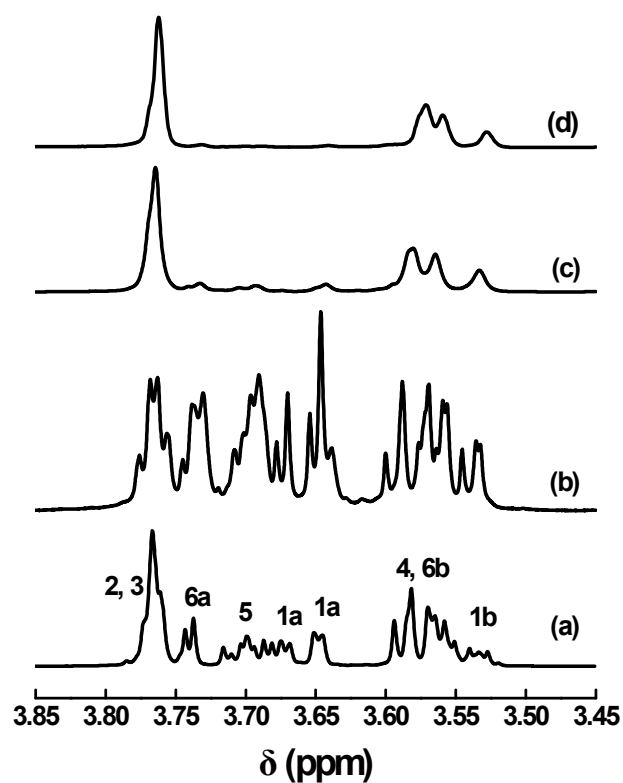

**Fig. S3**  $^1\text{H}$  NMR spectra of different D-sorbitol molecules in  $\text{D}_2\text{O}$  at room temperature.

(a) D-sorbitol; (b) The sorbitol molecules separated from the solution of D-sorbitol-1,2,3,4,5,6,6- $\text{d}_7$  hydrogenolysis in  $\text{H}_2\text{O}$  and  $\text{H}_2$ ; (c) The sorbitol molecules separated from the solution of D-sorbitol hydrogenolysis in  $\text{D}_2\text{O}$  and  $\text{H}_2$ ; (d) The sorbitol molecules separated from the solution of D-sorbitol hydrogenolysis in  $\text{D}_2\text{O}$  and  $\text{D}_2$ . All H atoms at different C positions are labeled in the spectrum of D-sorbitol (a).

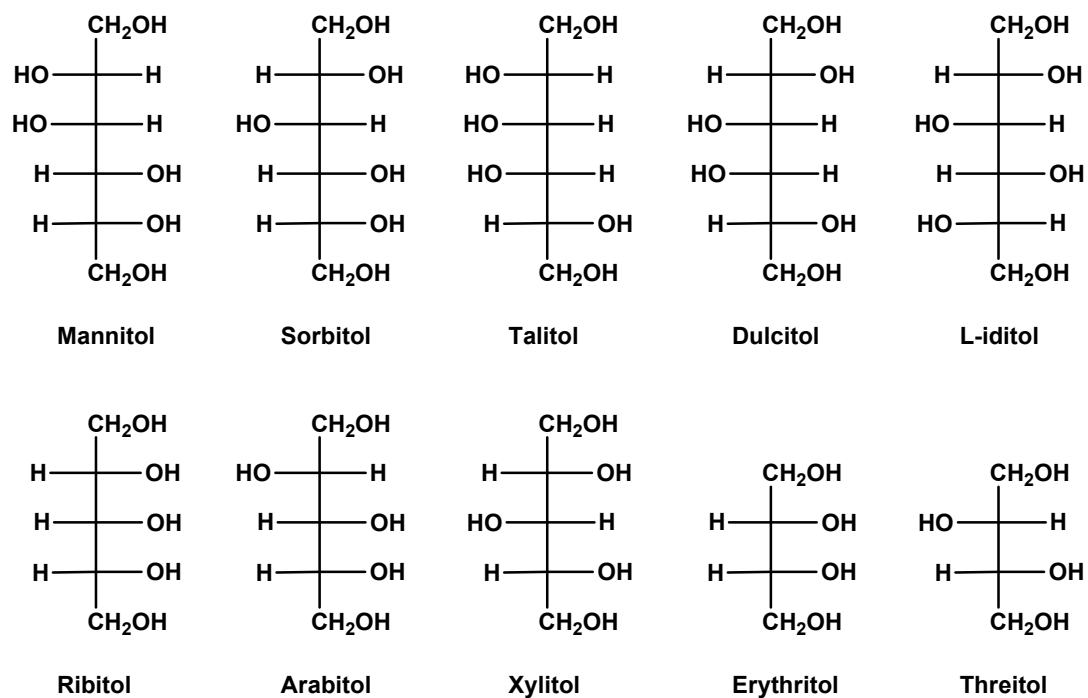

**Fig. S4** Fischer projections of hexitols, pentitols and tetritols

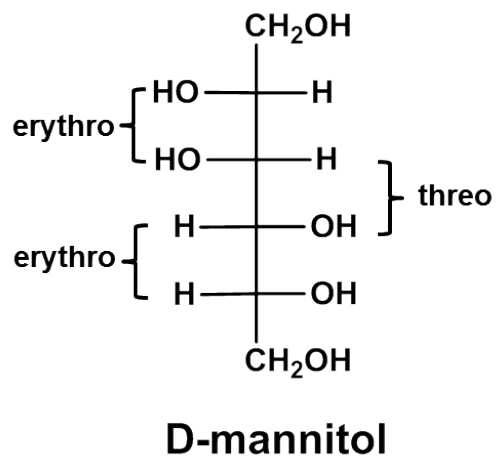

**Fig. S5** Erythro and threo sequences of hydroxyl groups of D-mannitol.
